# Supplementary material for: A High Enrichment Replenishment Rate Reduces Damaging Behaviors and Increases Growth Rate in Undocked Pigs Kept in Fully Slatted Pens
Source: Frontiers journal article supplement (doi:10.3389/fvets.2020.584706), 2020-11-13
Supplement: Data_Sheet_1.pdf [file Data_Sheet_1.pdf]

*Supplementary Material*

**A high enrichment replenishment rate reduces damaging behaviours and increases growth rate in undocked pigs kept in fully slatted pens**

**Jen-Yun Chou<sup>1,2,3</sup>, Dale A. Sandercock<sup>2</sup>, Rick B. D'Eath<sup>2\*</sup>, Keelin O'Driscoll<sup>1</sup>**

**\* Correspondence:**

Dr Jen-Yun Chou

[jenyun.chou@gmail.com](mailto:jenyun.chou@gmail.com)

**Supplementary Figure 1, 2A and 2B**

**Supplementary Table 1 and 2**

**Supplementary Figure 1.** Different quantities of grass provided in the rack post weaning

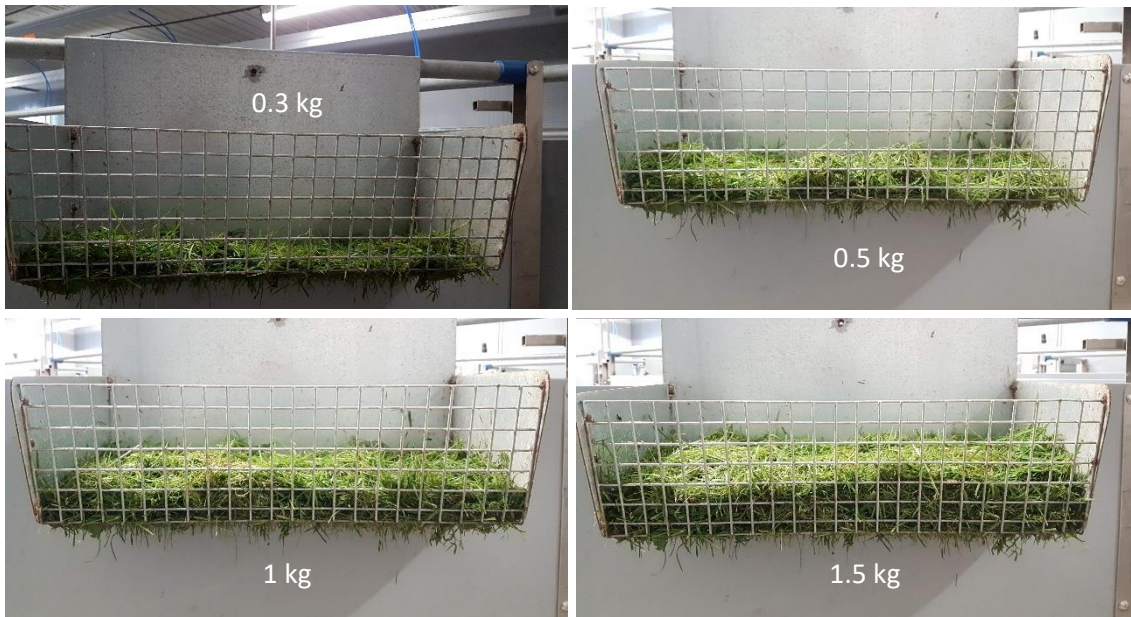

**Supplementary Figure 2.** Photos of enrichment items provided in the weaner (A) and finisher (B) stage

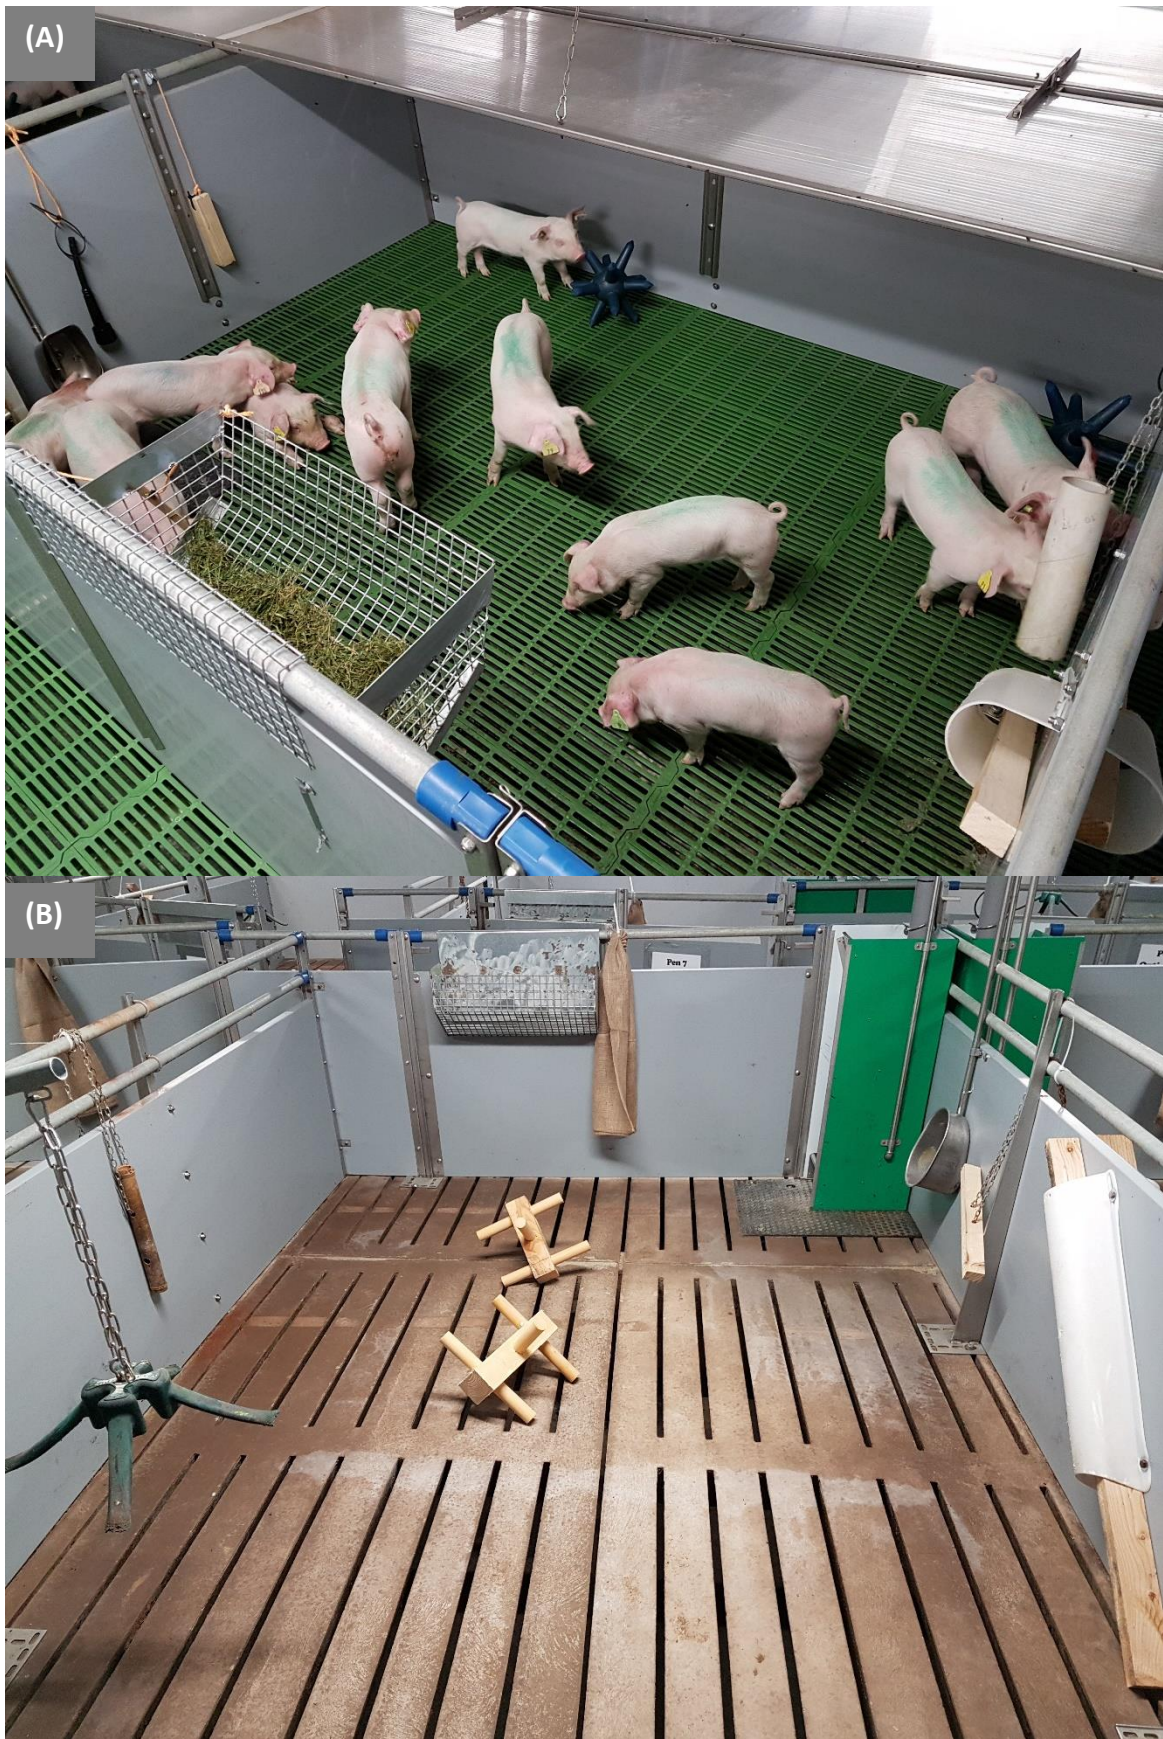

**Supplementary Table 1.** Enrichment provision list, each with different properties identified in van de Weered et al. (2003).

| Stage        | Properties of enrichment |              |            |           |              |             | Item                                    | Method of provision   |
|--------------|--------------------------|--------------|------------|-----------|--------------|-------------|-----------------------------------------|-----------------------|
|              | Rootability              | Durability   | Edibility  | Texture   | Presentation | Location    |                                         |                       |
| Weaner       | Rootable                 | Deformable   | Chewable   | soft      | Moveable     | Floor level | Rubber floor toy (Easyfix® Luna 117)    | Loose on the floor    |
|              | Rootable                 | Deformable   | Chewable   | soft      | Moveable     | Floor level | Rubber floor toy (Easyfix® Luna 117)    | Loose on the floor    |
|              | Rootable                 | Destructible | Ingestible | hard      | Attached     | Floor level | Spruce post                             | Placed in a dispenser |
|              | non-rootable             | Destructible | Ingestible | hard      | suspended    | Eye level   | Pine block                              | Suspended on a chain  |
|              | non-rootable             | Renewed      | Ingestible | loose     | Attached     | Eye level   | Fresh-cut grass                         | In an elevated rack   |
|              | non-rootable             | Destructible | Chewable   | soft      | suspended    | Eye level   | Cardboard tube                          | Suspended on a chain  |
|              | non-rootable             | Deformable   | Chewable   | soft      | suspended    | Eye level   | Rubber pipe                             | Suspended on a chain  |
| Finisher     | non-rootable             | Destructible | Chewable   | hard      | suspended    | Eye level   | 2 Ayous sticks                          | Suspended on a chain  |
|              | Rootable                 | Destructible | Chewable   | hard      | Moveable     | Floor level | Larch floor toy                         | Loose on floor        |
|              | Rootable                 | Destructible | Chewable   | hard      | Moveable     | Floor level | Spruce floor toy                        | Loose on floor        |
|              | Rootable                 | Destructible | Ingestible | hard      | Attached     | Floor level | Larch post                              | Placed in dispenser   |
|              | non-rootable             | Destructible | Ingestible | hard      | suspended    | Eye level   | Spruce block                            | Suspended on chain    |
|              | non-rootable             | Renewed      | Ingestible | loose     | Attached     | Eye level   | Fresh-cut grass                         | In an elevated rack   |
|              | non-rootable             | Destructible | Chewable   | soft      | suspended    | Eye level   | Hessian sack                            | Suspended             |
|              | non-rootable             | Deformable   | Chewable   | soft      | suspended    | Eye level   | Rubber hanging toy (Easyfix® Astro 200) | Suspended on a chain  |
| non-rootable | Destructible             | Chewable     | hard       | suspended | Eye level    | Bamboo      | Suspended on a chain                    |                       |

**Supplementary Table 2.** Estimated cost of all enrichment items used in the study

|                                             | Unit cost (€) | Enrichment replenishment rate |                               |                    |                     |                     |                    |                     |                     |                    |
|---------------------------------------------|---------------|-------------------------------|-------------------------------|--------------------|---------------------|---------------------|--------------------|---------------------|---------------------|--------------------|
|                                             |               | High                          |                               |                    | Medium              |                     |                    | Low                 |                     |                    |
|                                             |               | Use <sup>1</sup>              | Cost/pig/day (€) <sup>1</sup> | Cost/pig/cycle (€) | Use                 | Cost (€)            | Cost/pig/cycle (€) | Use                 | Cost (€)            | Cost/pig/cycle (€) |
| Grass (g) <sup>2</sup>                      | 0.00003       | 85.547 <sup>+</sup>           | 0.003 <sup>+</sup>            | 0.287              | 45.315 <sup>+</sup> | 0.002 <sup>+</sup>  | 0.152              | 23.289 <sup>+</sup> | 0.002 <sup>+</sup>  | 0.078              |
| <b>Weaner</b>                               |               |                               |                               |                    |                     |                     |                    |                     |                     |                    |
| Rubber floor toy (g)                        | 0.016         | 0.035 <sup>+</sup>            | 0.0006 <sup>+</sup>           | 0.0268             | 0.041 <sup>+</sup>  | 0.0007 <sup>+</sup> | 0.0313             | 0.036 <sup>+</sup>  | 0.0006 <sup>+</sup> | 0.0275             |
| Spruce post (g)                             | 0.001         | 0.188 <sup>+</sup>            | 0.0003 <sup>+</sup>           | 0.0126             | 0.246 <sup>+</sup>  | 0.0003 <sup>+</sup> | 0.0166             | 0.295 <sup>+</sup>  | 0.0004 <sup>+</sup> | 0.0198             |
| Cardboard tube (piece) <sup>3</sup>         | 0.124         | 0.417                         | -                             | 0.052              | 0.385               | -                   | 0.048              | 0.292               | -                   | 0.036              |
| Ayous sticks (2 pieces)                     | 0.732         | 0.172                         | -                             | 0.126              | 0.151               | -                   | 0.111              | 0.151               | -                   | 0.111              |
| Pine block (use) <sup>4</sup>               | 0.015         | 0.083                         | -                             | 0.001              | 0.083               | -                   | 0.001              | 0.083               | -                   | 0.001              |
| Rubber pipe (use) <sup>4</sup>              | 0.015         | 0.083                         | -                             | 0.001              | 0.083               | -                   | 0.001              | 0.083               | -                   | 0.001              |
| <b>Finisher</b>                             |               |                               |                               |                    |                     |                     |                    |                     |                     |                    |
| Larch floor toy (g)                         | 0.015         | 0.400 <sup>+</sup>            | 0.006 <sup>+</sup>            | 0.395              | 0.473 <sup>+</sup>  | 0.007 <sup>+</sup>  | 0.466              | 0.415 <sup>+</sup>  | 0.006 <sup>+</sup>  | 0.409              |
| Spruce floor toy (g)                        | 0.015         | 0.489 <sup>+</sup>            | 0.007 <sup>+</sup>            | 0.473              | 1.037 <sup>+</sup>  | 0.016 <sup>+</sup>  | 1.002              | 1.048 <sup>+</sup>  | 0.016 <sup>+</sup>  | 1.012              |
| Larch post (g)                              | 0.001         | 0.204 <sup>+</sup>            | 0.0002 <sup>+</sup>           | 0.012              | 0.189 <sup>+</sup>  | 0.0002 <sup>+</sup> | 0.011              | 0.168 <sup>+</sup>  | 0.0002 <sup>+</sup> | 0.010              |
| Spruce block (g)                            | 0.001         | 0.318 <sup>+</sup>            | 0.0003 <sup>+</sup>           | 0.020              | 0.406 <sup>+</sup>  | 0.0004 <sup>+</sup> | 0.026              | 0.547 <sup>+</sup>  | 0.0005 <sup>+</sup> | 0.035              |
| Rubber hanging toy (g)                      | 0.022         | 0.051 <sup>+</sup>            | 0.001 <sup>+</sup>            | 0.073              | 0.006 <sup>+</sup>  | 0.0001 <sup>+</sup> | 0.009              | 0.025 <sup>+</sup>  | 0.001 <sup>+</sup>  | 0.036              |
| Hessian sack (piece)                        | 1.000         | 0.115                         | -                             | 0.115              | 0.089               | -                   | 0.089              | 0.109               | -                   | 0.109              |
| Bamboo (piece) <sup>5</sup>                 | 0.254         | 0.115                         | -                             | 0.029              | 0.161               | -                   | 0.041              | 0.115               | -                   | 0.029              |
| <b>Total (production cycle)<sup>6</sup></b> |               |                               |                               | <b>1.623</b>       |                     |                     | <b>2.004</b>       |                     |                     | <b>1.915</b>       |

<sup>1</sup> For all items that were recorded by weight loss (g), the unit for use was g/pig/day (cost: €/pig/day, indicated with +), and for all other items the unit was per pig per weaner or finisher stage. There were two rubber floor toys provided in the weaner pen, so the use and cost were multiplied by two.

<sup>2</sup> The grass in the current study was collected free of charge, so the estimation used the current average grass silage price at €30/tonne. Per cycle cost was calculated based on 112 days in the full production cycle.

<sup>3</sup> The cardboard tubes in the current study were collected free of charge, so the estimation used the market price of similar products.

<sup>4</sup> The pine block and rubber pipe were minimally consumed, and the weight loss is not available. The rough estimation is based on the cost of 10g of the pine block consumed per use per batch. The bamboo was obtained for free and the surrogate cost was unattainable and therefore the same estimation as the pine block was used.

<sup>5</sup> The bamboos in the current study were collected free of charge, so the estimation used the cost of a pine block which was of similar size

<sup>6</sup> The total enrichment cost per cycle was calculated based on 48 days in the weaner stage and 64 days in the finisher stage.
